# Supplementary material for: Dissolved Inorganic Nutrients in the Western Mediterranean Sea (2004–2017)
Source: Copernicus journal article supplement (doi:10.5194/essd-2019-136), 2019-09-03
Supplement: Supplementary file 1 [file essd-2019-136-supplement.pdf]

# 1 Supplementary material – Part 1

2 **Figure 1S.** Overview of vertical inorganic nutrient profiles and spatial coverage of reference cruises.

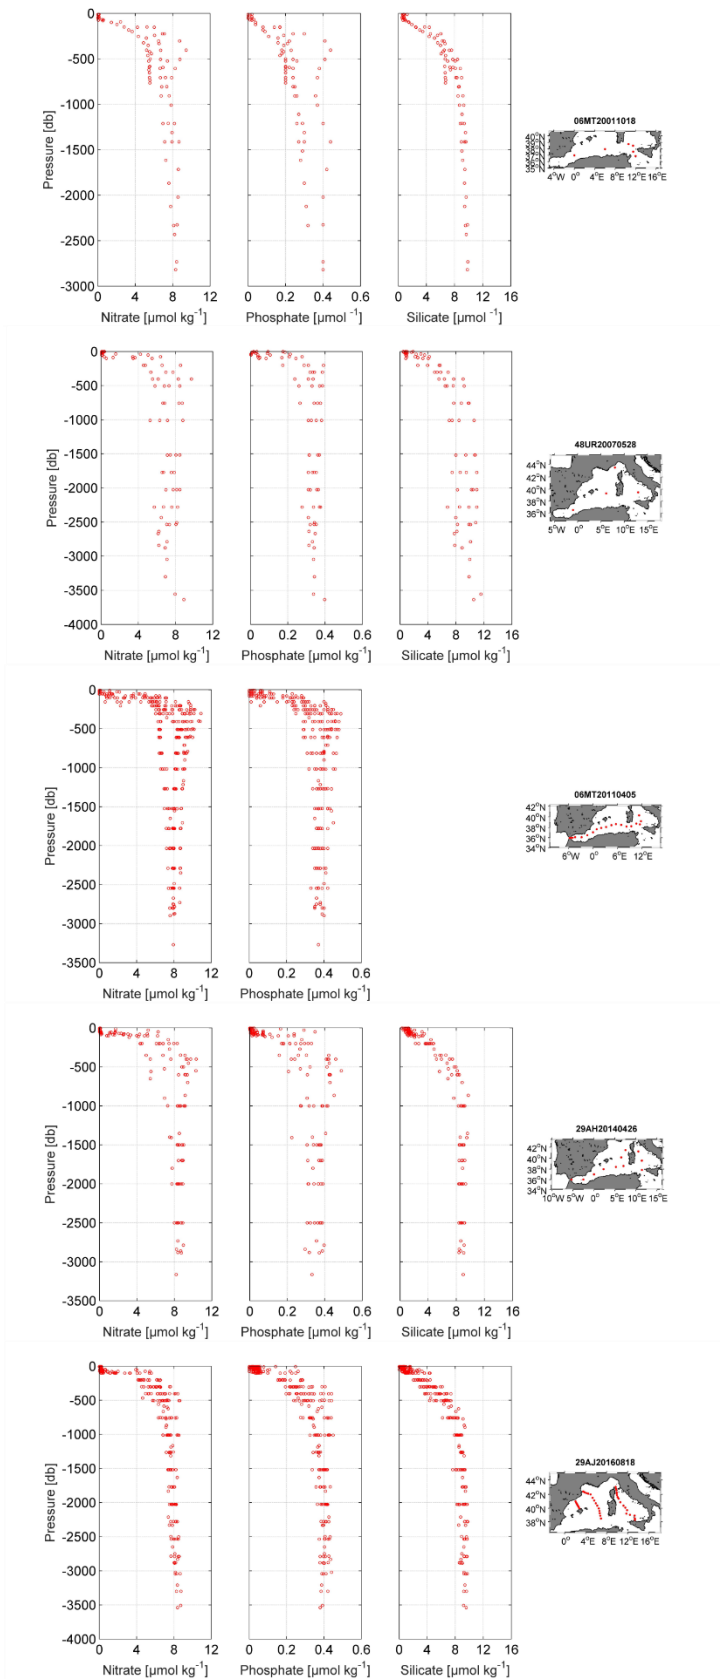

3

4

5 **Figure 2S.** Weighted mean offset for nitrate, before (grey) and after adjustment (blue). Error bars  
6 indicate the standard deviation of the absolute weighted offset. The dashed lines indicate the accuracy  
7 limit 2% for an adjustment to be recommended.

8

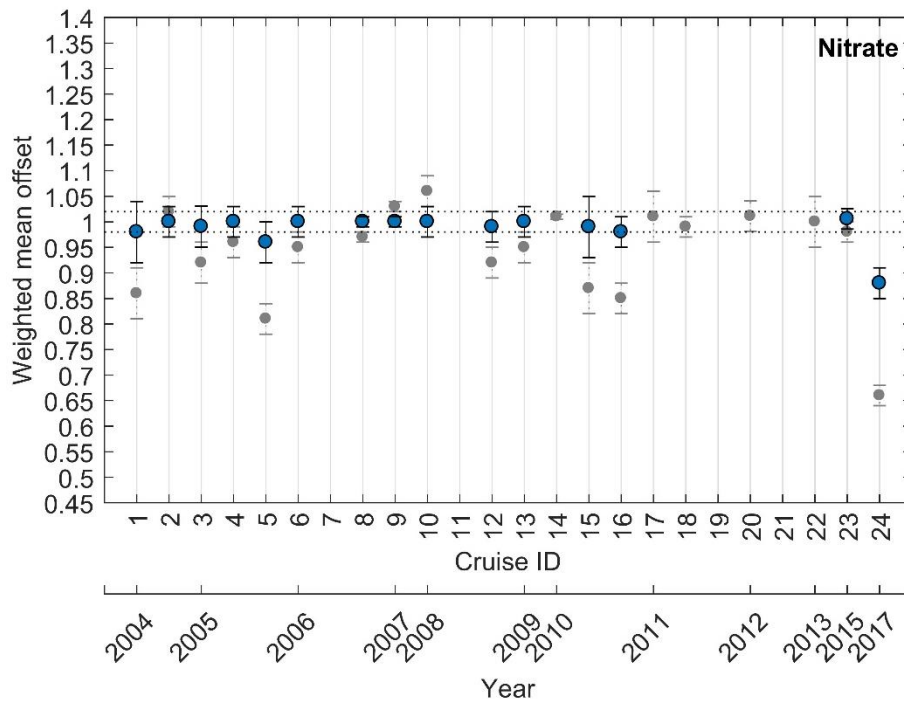

9

10 **Figure 3S.** Same as Fig. 2S but for phosphate.

11

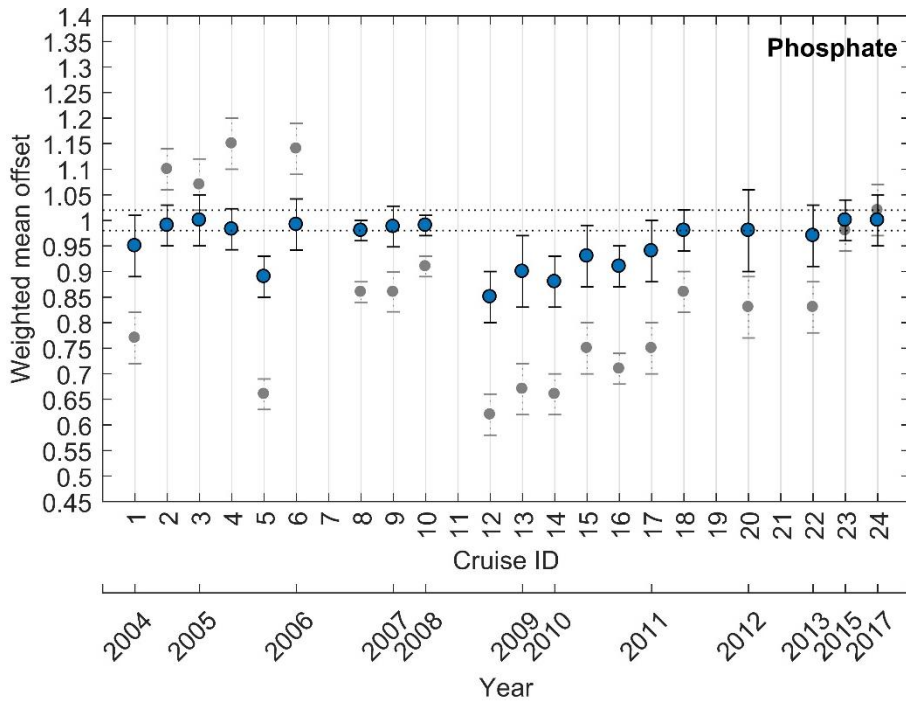

12

13

14 **Figure 4S.** Same as Fig. 2S but for silicate.

15

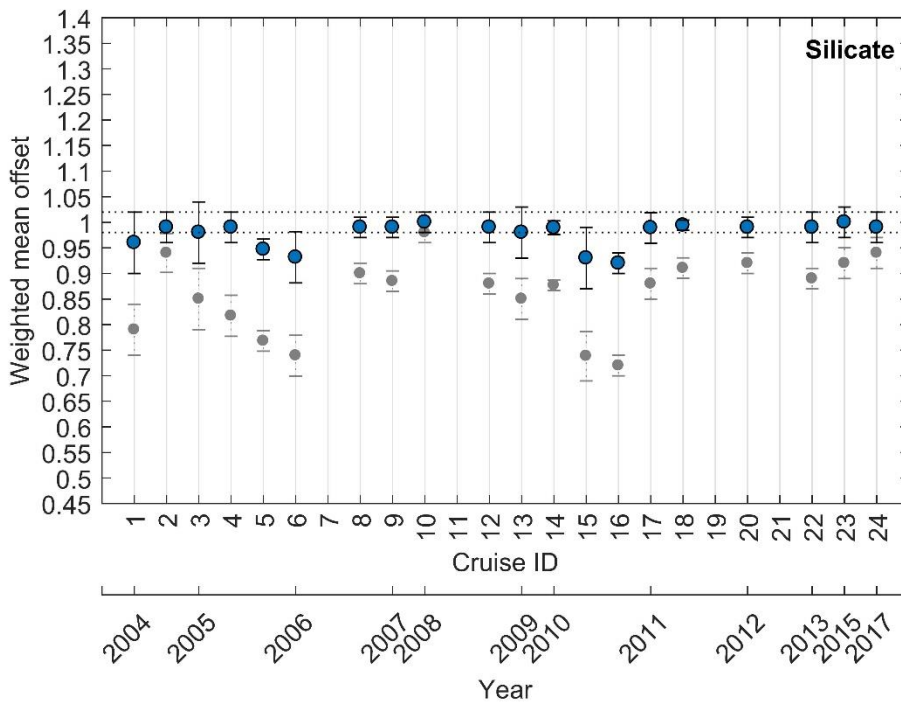

16

17

18

19 **Table 1S.** Reference cruises and coefficient of variation of nitrate, phosphate and silicate below  
20 1000db.

| Reference cruise<br>ID/ Expocode | CV below 1000db |           |          |
|----------------------------------|-----------------|-----------|----------|
|                                  | Nitrate         | Phosphate | Silicate |
| 6 06MT20011018                   | 0.064762        | 0.17936   | 0.035814 |
| 22 48UR20070528                  | 0.12141         | 0.074747  | 0.14479  |
| 27 29AJ20160818                  | 0.05263         | 0.062751  | 0.054572 |
| 64 06MT20110405                  | 0.073518        | 0.071952  | -        |
| 17 29AH20140426                  | 0.045697        | 0.11281   | 0.036588 |

21

22

## 23 **Supplementary material – Part 2**

### 24 **A1. Database description**

25 The database includes 870 stations sampled during 24 cruises between 2004 and 2017 in the Western  
26 Mediterranean Sea (the reference cruise 29AJ20160818 was included in this dataset as cruise #24  
27 because, it is part of the CNR-ISMAR data collection program), mainly on board of research vessels  
28 owned by the Italian National Research Council. It includes bottle data combined with CTD data.

29 In all stations, measurements were carried out with a CTD-rosette system consisting of a CTD SBE  
30 911 plus and a General Oceanics rosette with 24 12-l Niskin Bottles at the observed depth of the bottle  
31 sample. Temperature measurements were performed with an SBE-3/F thermometer with a resolution  
32 of 10<sup>-3</sup> °C and conductivity measurements were performed with an SBE-4 sensor with a resolution of  
33 3·10<sup>-4</sup> S/m. The probes were calibrated before and after the cruise. Except for salinity, no certified  
34 reference material (CRM) was used. CTD salinity was calibrated against measurements made with a  
35 salinometer.

36 Samples of nitrate, phosphate and silicate were frozen to -20°C and stored before being analysed in  
37 laboratories onshore.

38 Measurements were subjected to a rigorous quality control (primary and secondary quality control)  
39 and the dataset presented is the product adjusted after the application of quality control approaches.

40

41 **A2. Database organization details**

42 Cruise identification: To guarantee the comparability between measurements, an alphanumeric  
 43 identification code (ID) together with an expedition code (Expocode) are defined a unique identifier.

| Parameter                  | Unit/format           | Variable in dataset | Method/ description                                           | Comment                | Original dataset | Adjusted dataset |
|----------------------------|-----------------------|---------------------|---------------------------------------------------------------|------------------------|------------------|------------------|
| Expedition code            | 12 digits             | EXPCODE             | <i>Shipcode_yyyy_mm_dd</i><br><i>yyyy_mm_dd: starting day</i> |                        | ✓                | ✓                |
| Cruise ID                  |                       | CRUISE              | From 1 to 24                                                  |                        | ✓                | ✓                |
| Event date                 | yyyy-mm-dd            | DATE                |                                                               |                        | ✓                | ✓                |
| Event time                 | hhmm                  | TIME                |                                                               |                        | ✓                | ✓                |
| Day                        | dd                    | DAY                 |                                                               |                        | ✓                | ✓                |
| Month                      | mm                    | MONTH               |                                                               |                        | ✓                | ✓                |
| Year                       | yyyy                  | YEAR                |                                                               |                        | ✓                | ✓                |
| Longitude                  |                       | LATITUDE            |                                                               |                        | ✓                | ✓                |
| Latitude                   |                       | LONGITUDE           |                                                               |                        | ✓                | ✓                |
| Station number             |                       | STNNBR              |                                                               |                        | ✓                | ✓                |
| Niskin bottle number       |                       | BTLNBR              |                                                               |                        | ✓                | ✓                |
| Cast number                |                       | CASTNO              |                                                               |                        | ✓                | ✓                |
| Pressure                   | dbar                  | CTDPRS              | CTD pressure                                                  |                        | ✓                | ✓                |
| Depth                      | Meters                | DEPTH               | Depth from pressure                                           |                        | ✓                | ✓                |
| Salinity                   |                       | CTDSAL              | CTD salinity                                                  | PSS-78                 | ✓                | ✓                |
| Salinity flag              |                       | CTDSAL_FLAG_W       | WOCE flags                                                    |                        | ✓                | ✓                |
| Temperature                | °C                    | CTDTMP              | CTD temperature                                               | ITS-90                 | ✓                | ✓                |
| Potential temperature      |                       | THETA               | Theta from CTDTMP CTDSAL                                      |                        | ✓                | ✓                |
| Nitrate                    | μmol kg <sup>-1</sup> | NITRAT              | standard colorimetric methods*                                |                        | ✓                | ✓                |
| Nitrate flag               |                       | NITRAT_FLAG_W       | WOCE flags<br>After 1 <sup>st</sup> quality control           |                        | ✓                |                  |
| Recommended nitrate flag   |                       | NITRAT_FLAG_re      | WOCE flags<br>recommended final flagging                      | Details in Section 5.4 |                  | ✓                |
| Phosphate                  | μmol kg <sup>-1</sup> | PHSPHT              | standard colorimetric methods*                                |                        | ✓                | ✓                |
| Phosphate flag             |                       | PHSPHT_FLAG_W       | WOCE flags<br>After 1 <sup>st</sup> quality control           |                        | ✓                |                  |
| Recommended phosphate flag |                       | PHSPHT_FLAG_re      | WOCE flags<br>recommended final flagging                      | Details in Section 5.4 |                  | ✓                |
| Silicate                   | μmol kg <sup>-1</sup> | SILCAT              | standard colorimetric methods*                                |                        | ✓                | ✓                |
| Silicate flag              |                       | SILCAT_FLAG_W       | WOCE flags<br>After 1 <sup>st</sup> quality control           |                        | ✓                |                  |
| Recommended silicate flag  |                       | SILCAT_FLAG_re      | WOCE flags<br>recommended final flagging                      | Details in Section 5.4 |                  | ✓                |

44

45 \* Standard colorimetric methods of seawater analysis (Grasshoff et al. (1999))

46 - **Data format**

47 *Original dataset: CNR\_DIN\_WMED\_20042017\_original.csv:* This is the original dataset with 24  
 48 fields including flag variables of 24 cruises for nitrate, phosphate, silicate and CTD salinity from the  
 49 primary quality control.

50

51 *Adjusted dataset: CNR\_DIN\_WMED\_20042017\_adjusted.csv:* This is the adjusted product with 24  
 52 fields, after removing outlier data (issued from primary quality control) and after applying adjustment

53 factors from the secondary quality control. Recommendations of section 5.4 are included in the flag  
54 variables  
55
